1 **Title:** Charged Pore-lining Residues are Required for Normal Channel Kinetics in the Eukaryotic  
2 Mechanosensitive Ion Channel MSL1

3

4 **Authors:** Angela M. Schlegel, Elizabeth S. Haswell\*

5

6 NSF Center for Engineering Mechanobiology, Department of Biology, Washington University in  
7 St. Louis, St. Louis, MO 63105

8

9 \*Corresponding author

10

11 **Keywords:** MSL1; mechanosensitive ion channel; patch-clamp electrophysiology, giant *E. coli*  
12 spheroplasts; *Arabidopsis thaliana*

13 **ABSTRACT**

14 Mechanosensitive (MS) ion channels are widespread mechanisms for cellular mechanosensation  
15 that can be directly activated by membrane tension. The well-studied MscS family of MS ion  
16 channels is found in bacteria, archaea, and plants. MscS-Like (MSL)1 is localized to the inner  
17 mitochondrial membrane of *Arabidopsis thaliana*, where it is required for normal mitochondrial  
18 responses to oxidative stress. Like *Escherichia coli* MscS, MSL1 has a pore-lining helix that is  
19 kinked. However, in MSL1 this kink is comprised of two charged pore-lining residues, R326 and  
20 D327. Using single channel patch-clamp electrophysiology in *E. coli*, we show that altering the  
21 size and charge of R326 and D327 leads to dramatic changes in open state dwell time. Modest  
22 changes in gating pressure and open state stability were also observed while no effects on  
23 channel rectification or conductance were detected. MSL1 channel variants had differing  
24 physiological function in *E. coli* hypoosmotic shock assays, without clear correlation between  
25 function and particular channel characteristics. Taken together, these results demonstrate that  
26 altering pore-lining residue charge and size disrupts normal channel state stability and gating  
27 transitions, and led us to propose the “sweet spot” model. In this model, the transition to the  
28 closed state is facilitated by attraction between R326 and D327 and repulsion between R326  
29 residues of neighboring monomers. In the open state, expansion of the channel reduces inter-  
30 monomeric repulsion, rendering open state stability influenced mainly by attractive forces. This  
31 work provides insight into how unique charge-charge interactions can be combined with an  
32 otherwise conserved structural feature to help modulate MS channel function.

33

## 34 Introduction

35 Living organisms constantly experience physical force from both internal and external sources  
36 and possess a variety of mechanisms for detecting and responding to key mechanical stimuli  
37 (Fruleux et al., 2019; Persat et al., 2015; Yang et al., 2015). Among these mechanisms are  
38 mechanosensitive (MS) ion channels, which are found in all kingdoms of life (Hamilton, Schlegel,  
39 et al., 2015; Kloda & Martinac, 2001; Kung et al., 2010; Ranade et al., 2015). Most MS channels  
40 are opened (gated) primarily by increases in lateral membrane tension (Cox et al., 2019).

41  
42 While MS ion channels are united by their primary gating stimulus rather than a common  
43 mechanosensory sequence or structure, individual MS channel families have been identified by  
44 the presence of conserved domains. One such family is the MscS family, which is defined by  
45 similarity to the *E. coli* Mechanosensitive ion channel of Small conductance (*EcMscS*) (Haswell,  
46 2007; Malcolm & Maurer, 2012; Pivetti et al., 2003). *EcMscS*, along with the Mechanosensitive  
47 ion channel of Large conductance (*MscL*), allow *E. coli* cells to survive hypoosmotic shock. Sudden  
48 transfer into a hypotonic solution leads to water entry into the cell, subsequent swelling, and  
49 presumably an increase in lateral membrane tension. Increased membrane tension in turn opens  
50 *MscS* and *MscL*, allowing for rapid osmoregulation and preventing cell damage (Bialecka-Fornal  
51 et al., 2015; Boer et al., 2011; Buda et al., 2016; Levina, 1999; Rojas et al., 2014).

52  
53 Multiple structures of *EcMscS* describe a homoheptameric channel with a transmembrane (TM)  
54 domain, comprised of three TM helices per monomer, atop a large cytoplasmic “cage” (Bass et  
55 al., 2002; Lai et al., 2013; Pliotas et al., 2015; Rasmussen et al., 2019; Reddy et al., 2019;  
56 Steinbacher et al., 2007; Wang et al., 2008). A key feature of the *EcMscS* structure is the pore-  
57 lining TM helix, TM3, which, in the nonconducting state, kinks mid-way through at G113, such  
58 that its C-terminal portion points outward from the pore and lies parallel to the lipid bilayer (Bass  
59 et al., 2002; Lai et al., 2013; Rasmussen et al., 2019; Reddy et al., 2019). During gating, TM3 is  
60 proposed to pivot outward around and partially straighten this kink, thus removing pore  
61 occlusions and allowing for ion flow (Lai et al., 2013; Pliotas et al., 2015; Vásquez et al., 2008;  
62 Wang et al., 2008). Mutations to either G113 or neighboring Q112 alter channel characteristics

63 such as desensitization/inactivation and entry into subconducting states (Akitake et al., 2007;  
64 Edwards et al., 2008), highlighting the importance of this structural feature in shaping channel  
65 behavior.

66  
67 Based on homology to the pore-lining domain and top portion of the cytoplasmic domain of  
68 *EcMscS*, *MscS* family members have been found throughout the bacterial and archaeal kingdoms,  
69 in all currently available plant genomes, and in some protist genomes (Basu & Haswell, 2017).  
70 The genome of the model flowering plant *Arabidopsis thaliana* encodes ten homologs of *EcMscS*,  
71 termed MscS-Like (MSL) channels (Haswell, 2007). MSLs localize to various compartments,  
72 including the plasma membrane (Hamilton, Jensen, et al., 2015; Haswell et al., 2008), chloroplast  
73 membrane (Haswell & Meyerowitz, 2006), and inner mitochondrial membrane (Lee et al., 2016).  
74 Mechanosensitive channel activity has been demonstrated in heterologous systems for MSL1,  
75 MSL8, and MSL10 (Hamilton & Haswell, 2017; Lee et al., 2016; Maksaev & Haswell, 2012) and in  
76 native membranes for MSL8 and MSL10 (Hamilton, Jensen, et al., 2015; Haswell et al., 2008).  
77 MSL2/3 and MSL8 are involved in osmoregulation of chloroplasts and pollen, respectively (Veley  
78 et al., 2013; Hamilton, Jensen, et al., 2015; Hamilton & Haswell, 2017), much like *EcMscS* in *E. coli*  
79 cells. However, MSL10 has a cell-death signaling activity that is separable from its MS channel  
80 activity (Maksaev et al., 2018; Veley et al., 2014), revealing MSL function beyond maintaining  
81 osmotic homeostasis.

82  
83 MSL1 is localized to the inner membrane of mitochondria and appears to be involved in  
84 regulating the redox status of mitochondria during stress (Lee et al., 2016). Of all the *Arabidopsis*  
85 MSLs, it most closely resembles *EcMscS* in overall structure, channel behavior, and sequence.  
86 Structural and biochemical analyses of MSL1 revealed a homoheptameric channel consisting of  
87 a TM domain, comprised of 5 TM helices per monomer, atop a large cage region likely to be  
88 located in the mitochondrial matrix (Deng et al., 2020; Lee et al., 2016; Li et al., 2020). MSL1 and  
89 *EcMscS* are both slightly anion preferring and have average conductances of ~1.2 nS at negative  
90 membrane potentials (Edwards et al., 2008; Lee et al., 2016; Sukharev, 2002). However,  
91 compared to *EcMscS*, MSL1 shows both stronger rectification (a directional preference for ion

92 flow) and hysteresis (a difference in open and closing tensions), with a preference for  
93 transporting anions out of the cell, and with channel closure often occurring at lower membrane  
94 tension than channel opening (Anishkin et al., 2010; Belyy et al., 2010; Sukharev et al., 2007). A  
95 sequence alignment (Figure 1A) revealed strong conservation between the pore-lining helices of  
96 MSL1 and *EcMscS* with a singular exception: two neighboring residues are charged in MSL1 (R326  
97 and D327) and polar in *EcMscS* (Q112 and G113) (red box, Figure 1A).

98  
99 Rectification of MSL1 is also strong compared to other MscS family members for which this  
100 feature has been characterized (Lee et al., 2016) and most closely resembles that of MscS-like  
101 activity detected in *V. cholerae* cells (Rowe et al., 2013). One of three MscS-like genes from *V.*  
102 *cholerae* also encodes a positively charged and a negatively charged residue at the same position  
103 as R326 and D327 (Figure 1A). With the exception of MSC1 from *Chlamydomonas reinhardtii*  
104 chloroplasts and MscMJ from *Methanocaldococcus jannaschi*, (Kloda & Martinac, 2001;  
105 Nakayama et al., 2007), other MscS family members from archaea, bacteria, and plants show  
106 only mild rectification (Hamilton, Jensen, et al., 2015; Kloda & Martinac, 2001; Maksaev &  
107 Haswell, 2012; Nakayama et al., 2013; Petrov et al., 2013; Edwards et al., 2008). While the  
108 correlation between charged residues and rectification in the MscS family is not strict, charged  
109 residues have been demonstrated to control rectification in other channels (Li et al., 2008).

110  
111 Recently reported cryoEM structures of MSL1 in the closed state (Deng et al., 2020; Li et al., 2020)  
112 place R326 and D327 at the kink of the pore-lining helix TM5, which is bent such that its C-  
113 terminal half runs parallel to the bilayer (Figure 1B), similar to TM3 in the non-conducting state  
114 of *EcMscS*. In the MSL1<sup>A320V</sup> structure, proposed to represent the open state (Deng et al., 2020),  
115 TM5 is almost completely straight and sits diagonally within the bilayer (Figure 1C). These  
116 structures support a gating transition in which neighboring R326 and D327 side chains point  
117 inward from the TM5 kink in the closed state (Figure 1D), then are pushed towards each other  
118 and away from the pore during opening (Figure 1E). TM5 helices from neighboring monomers  
119 also move farther apart during channel opening. As with Q112 and G113 of *EcMscS* (Akitake et

120 al., 2007; Edwards et al., 2008), altering R326 and D327 of MSL1 may affect kink formation and  
121 thus channel behavior.

122

123 In this study, we investigated the roles of R326 and D327 in MSL1 rectification and other  
124 hallmarks of MSL1 channel behavior using single-channel patch-clamp electrophysiology and  
125 physiological assays in *E. coli*. Our results provide insight into the roles of individual residues in  
126 the MSL1 pore-lining helix and validate recently published MSL1 cryoEM structures (Deng et al.,  
127 2020; Li et al., 2020). More broadly, our study contributes to the understanding of how the  
128 specific composition of common structural features, like the kinked pore-lining helix found in the  
129 MscS family, can influence properties of MS ion channels.

130

## 131 MATERIALS AND METHODS

132 **Subcloning and *E. coli* strains.** The MSL1 sequence lacking the putative N-terminal mitochondrial  
133 transit peptide sequence (residues 1-79; (Lee et al., 2016)), codon-optimized for translation in *E.*  
134 *coli*, was synthesized (ThermoFisher Scientific, USA) and cloned into the pET300 vector to create  
135 pET300-MSL1. A C-terminal GFP tag was then added before the stop codon of MSL1 with an EcoRI  
136 cut site as the linker sequence between MSL1 and GFP to create pET300-MSL1-GFP. Site directed  
137 mutagenesis was then used to create pET300-MSL1<sup>R326Q</sup>-GFP, pET300-MSL1<sup>D327G</sup>-GFP, pET300-  
138 MSL1<sup>R326Q D327G</sup>-GFP, pET300-MSL1<sup>D327N</sup>-GFP, and pET300-MSL1<sup>R326Q D327N</sup>-GFP (primer sequences  
139 in Table S1). Mutations were verified using restriction enzyme digest and sequencing; the R326Q  
140 mutation causes the loss of a PmlI site, the D327G mutation creates an EcoRI site, and the D327N  
141 mutation creates a SspI site. To create pET300-MscS-GFP, the MSL1 sequence was replaced with  
142 the full-length *EcMscS* sequence. Lysogenization of *E. coli* strains FRAG-1 (Epstein & Kim, 1971),  
143 MJF465 (Levina, 1999), MJF641, and MJF516 (Edwards et al., 2012) was performed using the  
144 Novagen λDE3 Lysogenization Kit (Millipore Sigma) following manufacturer's instructions.  
145 Lysogenized strains used in this study are indicated by (DE3).

146

147 **Sequence alignment and functional predictions.** The MSL1 cryoEM structures (RCSB Protein  
148 Data Bank, PDB ID 6VXM (Deng et al., 2020) and 6LYP (Li et al., 2020)) were visualized and images  
149 generated using PyMol (Schrödinger, Inc.). MscS family member protein sequences were  
150 obtained from publicly available data bases with accession numbers as follows: *Escherichia coli*  
151 MscS (*EcMscS*), UniProt ID POCOS2; *Arabidopsis thaliana* MSL1 (MSL1), At4g00290; *Arabidopsis*  
152 *thaliana* MSL8 (MSL8), At2g17010; *Arabidopsis thaliana* MSL10 (MSL10), At5g12080;  
153 *Corynebacterium glutamicum* MscCG, RefSeq WP\_011014245.1; *Chlamydomonas reinhardtii*  
154 MSC1, GenBank ID AB288852.1; *Silicibacter pomeroyi* MscSP, UniProt ID Q5LMR6;  
155 *Methanococcus jannaschii* MscMJ, UniProt ID Q6M0K6; *M. jannaschii* MscMJLR, UniProt ID  
156 Q58543. Structural features of sequences were either assigned based on previously published  
157 structural data or, when none was available, predicted using the TMHMM server, v 2.0 (DTU  
158 HealthTech). Sequences of 70 amino acids containing predicted or known pore-lining sequences  
159 were then aligned in Unipro UGENE software using the built-in MUSCLE algorithm.

160

161 **MSL1 variant expression and localization in *E. coli*.** Approximately 10 colonies of MJF465(DE3)  
162 cells expressing GFP-tagged MSL1 variants were placed into a 14 mL culture tube with 3 mL LB +  
163 1 mM carbenicillin and shaken at 37°C, 250 rpm to an OD<sub>600</sub> of ~0.5. 2 mL of this culture was  
164 added to 100 mL LB + 1 mM carbenicillin and shaken at 37°C, 250 rpm until OD<sub>600</sub> ~0.5. Isopropyl  
165 β-D-1-thiogalactopyranoside (IPTG) was then added to a final concentration of 1 mM and cultures  
166 shaken at 37°C, 250 rpm for either 30 min (for expression of MscS-GFP and GFP) or 1 hour (for  
167 expression of untagged MSL1 and GFP-tagged MSL1 variants). To image GFP signal, cells were  
168 placed on a 1% agarose pad, covered with a coverslip, then imaged using an Olympus FV3000  
169 confocal microscope. GFP was excited using a 488 nm laser and GFP emission was collected from  
170 493-533 nm. For images of cells expressing cytoplasmic GFP, laser transmissivity was 5% and PMT  
171 voltage was 436 V. For cells expressing either a GFP-tagged MSL1 variant or MscS-GFP, laser  
172 transmissivity was set at 6% and PMT voltage was 515 V. Both bright field and GFP fluorescence  
173 images were taken for each sample.

174

175 **Patch-clamp electrophysiology.** Giant *E. coli* spheroplasts were made according to (Schlegel &  
176 Haswell, 2020). The MJF641(DE3) strain was used for conductance analysis, MJF516(DE3) cells  
177 for tension sensitivity measurements, and either MJF641(DE3) or MJF516(DE3) cells for open  
178 state dwell time measurements. Cells were transformed with the appropriate expression  
179 constructs and grown overnight on LB plates containing 1 mM carbenicillin at 37°C. Cells were  
180 then cultured in LB with 1 mM carbenicillin at 37°C, 250 rpm to an OD<sub>600</sub> of 0.4-0.5, then diluted  
181 1:10 in 30 mL LB + 60 µg/mL cephalixin (without carbenicillin) and shaken at 42°C, 180 rpm until  
182 cells reached ~75-100 µm in length. IPTG was added to each culture to a final concentration of 1  
183 mM and cultures shaken at 42°C, 180 rpm for 1 hour. Cultures were incubated at 4°C overnight,  
184 then spun down at 3000 xg. Cell pellets were gently resuspended in 2.5 mL 0.8 M sucrose and  
185 the following spheroplast reaction components added in order to the resuspension, with gentle  
186 swirling after each addition: 150 µL 1 M Tris-HCl (pH 7.2), 120 µL 5 mg/mL lysozyme, 50 µL 5  
187 mg/mL DNase I, 150 µL 0.125 M EDTA. The reaction was incubated at room temperature for 5-7  
188 min, then stopped by adding 1 mL stop solution (0.68 M sucrose, 19 mM MgCl<sub>2</sub>, 9.5 mM Tris-HCl



189 pH 7.2, 0.22  $\mu$ m filter-sterilized) and swirling to mix. 3.5 mL dilution solution (0.78 M sucrose, 1  
190 mM MgCl<sub>2</sub>, 1 mM Tris-HCl pH 7.2, 0.22  $\mu$ m filter-sterilized) was added, and 275  $\mu$ L aliquots stored  
191 at -80°C.

192 All data were collected from inside-out configuration patches. The pipette buffer used  
193 was 200 mM KCl, 90 mM MgCl<sub>2</sub>, 5 mM CaCl<sub>2</sub>, 5 mM HEPES, pH 7.4. The bath buffer was identical  
194 to the pipette buffer with the addition of 400 mM sucrose. Pressure application was controlled  
195 using an HSPC-1 pressure clamp system (ALA Scientific Instruments) and data were acquired  
196 using an Axopatch 200B amplifier and a Digidata 1440A digitizer (Molecular Devices) at 20 kHz  
197 and low-pass filtered at 5 kHz except for open state dwell time measurements, for which data  
198 was collected at 10 kHz. Data were analyzed using Clampfit 10.6 (Molecular Devices).

199 Conductance measurements were performed at membrane potentials ranging from -150  
200 mV to 80 mV using 5 s symmetric pressure ramps. The largest conductance value for each gating  
201 event was taken to avoid including potential substate conductance measurements in the average  
202 conductance calculations. Conductances were then calculated using Ohm's law at membrane  
203 potentials of -120 mV, -60 mV, and 60 mV.

204 Tension sensitivity of MSL1 variants was assessed by determining the gating pressure of  
205 MSL1 or an MSL1 variant relative to that of endogenously expressed MscL, using 5-10 s symmetric  
206 pressure ramps at a membrane potential of -70 mV. The first gating events observed for each  
207 channel in a single trace were used and only MSL1 gating events lasting a minimum of 1 s were  
208 considered. Data were only analyzed if both MSL1 variant and MscL gating events were observed  
209 in the same trace and if no MSL1 variant gating events were observed prior to application of  
210 additional negative pressure to the patch.

211 Open state dwell time measurements were performed using a 2-4 s symmetric pressure  
212 ramp followed by monitoring of channel activity until 97.7 s after the start of the pressure ramp.  
213 Membrane potential was maintained at -70 mV throughout the course of this protocol. Traces  
214 were not analyzed if channel activity was detected prior to application of the pressure ramp and  
215 a channel was considered closed if no activity was observed for 5 s. Individual traces were pooled  
216 from 10 patches per channel in order to calculate the percentage of gating events falling into one  
217 of five open state dwell time bins: 0-19.99 s, 20-39.99 s, 40-59.99 s, 60-79.99 s, 80+ s.

218

219 ***E. coli* growth assay.** Five freshly transformed MJF465(DE3) colonies were grown at 37°C, 250  
220 rpm in LB with 1 mM carbenicillin to an OD<sub>600</sub> of ~0.5. Cultures were then diluted to an OD<sub>600</sub> of  
221 0.05 in either LB only or LB + 1 mM IPTG and three 250 µL aliquots of each dilution transferred  
222 to a clear, flat-bottom 96-well plate. This plate was then placed in an Infinite M200 Pro plate  
223 reader, then incubated at 37°C with continuous shaking and OD<sub>600</sub> measurements made every 15  
224 min for a total of 6 h. Growth assays were repeated using cells from three independent  
225 transformations.

226

227 ***E. coli* hypoosmotic shock survival assay.** Assays were conducted as described in (Bartlett et al.,  
228 2004) with some modifications. Freshly transformed colonies were grown overnight at 37°C, 250  
229 rpm in low glucose citrate-phosphate media (60 mM Na<sub>2</sub>HPO<sub>4</sub>, 5 mM K<sub>2</sub>HPO<sub>4</sub>, 7 mM citric acid, 7  
230 mM NH<sub>4</sub>SO<sub>4</sub>, 0.4 mM MgSO<sub>4</sub>, 3 µM thiamine, 6 µM iron) with 0.04% glucose and 1 mM  
231 carbenicillin. Overnight cultures were diluted 1:5 in citrate-phosphate media with 0.2% glucose  
232 and grown to an OD<sub>600</sub> of ~0.3 at 37°C, 250 rpm. Cultures were then diluted 1:1 in citrate-  
233 phosphate media with 0.2% glucose and 1 M NaCl and grown to an OD<sub>600</sub> of ~0.3, at which point  
234 expression was induced for 1 hour by the addition of 1 mM IPTG. Cultures were diluted 1:20 in  
235 either ddH<sub>2</sub>O for shocked samples or 0.5 M NaCl citrate-phosphate buffer (60 mM Na<sub>2</sub>HPO<sub>4</sub>, 5  
236 mM K<sub>2</sub>HPO<sub>4</sub>, 7 mM citric acid, 7 mM NH<sub>4</sub>SO<sub>4</sub>) for unshocked controls and shaken at 37°C, 250  
237 rpm for 15 min. Cultures were serially diluted 1:10 six times in either ddH<sub>2</sub>O (shocked samples)  
238 or 0.5 M NaCl citrate-phosphate buffer (unshocked controls). A 5 µL aliquot of each dilution was  
239 then spotted onto LB + carbenicillin plates and grown overnight at 30°C. The next day, the  
240 number of colonies grown from each dilution were counted and survival ratios of  
241 shocked/unshocked colonies calculated for each strain/construct combination calculated using  
242 values from dilutions producing up to 50 colonies.

243

## 244 RESULTS

245 To begin to study the role of R326 and D327 in MSL1 function, an *E. coli* codon-optimized version  
246 of MSL1 lacking the predicted mitochondrial target sequence (2-79 aa; (Lee et al., 2016)), was  
247 fused to GFP and expressed from the T7-inducible pET300 vector. For all experiments, constructs  
248 were transformed into lysogenized *E. coli* containing IPTG-inducible T7 promoters (see Methods).  
249 Four different lysogenized *E. coli* strains were used: MJF465(DE3) (*mscS*<sup>-</sup> *mscK*<sup>-</sup> *mscL*<sup>-</sup> (Levina,  
250 1999)), MJF516(DE3) (*mscS*<sup>-</sup> *mscK*<sup>-</sup> *ybiO*<sup>-</sup> *yjeP*<sup>-</sup> (Edwards et al., 2012)), MJF641(DE3) (*mscS*<sup>-</sup> *mscK*<sup>-</sup>  
251 *ybdG*<sup>-</sup> *ybiO*<sup>-</sup> *yjeP*<sup>-</sup> *ynaI*<sup>-</sup> *mscL*<sup>-</sup> (Edwards et al., 2012)), and their parental strain FRAG-1(DE3)  
252 (Epstein & Kim, 1971).

253

### 254 **GFP-tagged MSL1 variants localize to the periphery of *E. coli* cells and do not affect cell growth.**

255 We assessed the expression and localization of GFP-tagged MSL1 variants in *E. coli* strain  
256 MJF465(DE3) cells by imaging induced cells using a confocal microscope (Figure 2A). All versions  
257 of GFP-tagged MSL1 produced punctate GFP signal around the cell periphery that was similar to  
258 *EcMscS*-GFP (as previously observed (Romantsov et al., 2010; van den Berg et al., 2016)), and  
259 distinct from cytoplasmic free GFP. Growth rates of all strains were indistinguishable with (Figure  
260 2B) or without (Figure 2C) IPTG (Okada et al., 2002).

261

### 262 **Mutations to R326 and D327 do not alter channel conductance or rectification.** We next sought

263 to characterize the channel behavior of MSL1-GFP variants using single-channel patch-clamp  
264 electrophysiology in giant *E. coli* spheroplasts as in (Schlegel and Haswell, 2020). IV curves with  
265 membrane potentials ranging from -150 mV to 80 mV for each GFP-tagged MSL1 variant are  
266 shown in Figure 3. As demonstrated previously (Lee et al., 2016), MSL1-GFP channel activity was  
267 triggered by application of suction to inside-out excised patches and was characterized by a  
268 single-channel conductance of ~1.2 nS at negative membrane potentials and markedly reduced  
269 conductance at membrane potentials greater than 20 mV. No major differences were observed  
270 between the IV curves of MSL1-GFP and any GFP-tagged MSL1 variant. Thus, none of the  
271 mutations to R326 nor D327 we tested changed the rectification behavior of MSL1.

272

273 The IV curves shown in Figure 3 were used to calculate conductance at 60 mV, -60 mV, and -120  
274 mV for each GFP-tagged MSL1 variant (Table 1). The single-channel conductances of MSL1<sup>R326Q</sup>  
275 D327G-GFP and MSL1<sup>R326Q D327N</sup>-GFP were significantly lower than that of MSL1-GFP at -60 mV  
276 (0.82±0.08 nS, 0.81±0.11 nS, and 1.19±0.10 nS, respectively). However, no significant differences  
277 in conductance between any variants were detected at 60 mV nor -120 mV. Conductances at -  
278 120 mV are the most physiologically relevant, as plant mitochondria maintain very negative inner  
279 membrane potentials (Gerencser et al., 2012; Schwarzländer et al., 2012). In a previous  
280 characterization of MSL1<sup>R326Q D327G</sup>, (Li et al., 2020) reported a reduced single channel current but  
281 greater total current than the wild type. While these results were interpreted as a higher number  
282 of channels open, they could also be due to longer open state dwell times (see below). Taken  
283 together, the data shown in Figure 2, Figure 3, and Table 1 indicate that the size and charge at  
284 326 and 327 are not critical for protein stability, localization, or single channel conductance.  
285 Unexpectedly, changing R326 and D327 to the analogous residues in *EcMscS* did not reduce MSL1  
286 rectification (Figure 3).

287  
288 **Mutations to R326 and D327 have modest effects on MSL1 tension sensitivity.** Given that R326  
289 and D327 did not affect rectification, we next wished to examine their role in the gating process  
290 of MSL1. We started by determining the gating pressure of each MSL1-GFP variant. Gating  
291 pressure is a proxy for tension sensitivity; for MS channels in *E. coli* it is often measured relative  
292 to endogenously expressed MscL and reported as the pressure threshold ratio ( $P_x/P_L$ ) (Blount et  
293 al., 1996). We expressed each GFP-tagged MSL1 variant in *E. coli* strain MJF516(DE3) (Edwards et  
294 al., 2012) and generated giant spheroplasts. Using 5-10 s pressure ramps, we measured gating  
295 pressures of the first channel openings of each GFP-tagged MSL1 variant and of MscL, and  
296 calculated the  $P_x/P_L$  values for each variant (Figure 4). MSL1<sup>R326Q D327G</sup>-GFP, MSL1<sup>D327N</sup>-GFP, and  
297 MSL1<sup>R326Q D327N</sup>-GFP had significantly higher  $P_x/P_L$  than MSL1-GFP (0.65-0.71 compared to 0.49,  
298 respectively). In contrast, pressure threshold ratios of MSL1<sup>R326Q</sup>-GFP, MSL1<sup>D327G</sup>-GFP, and MSL1-  
299 GFP could not be statistically distinguished, although the average  $P_x/P_L$  of individual patches  
300 containing MSL1<sup>D327G</sup>-GFP were typically lower than those of MSL1-GFP. These results thus

301 indicate that both size and charge at the MSL1 TM5 kink influence gating pressure, and that the  
302 residue at 327 appears to play a dominant role.

303

304 **R326 and D327 exert dramatic and opposing effects on open state dwell time.** We also  
305 examined the open state dwell times of GFP-tagged MSL1 variants (Figure 5). Using a modified  
306 version of a previously published protocol (Akitake et al., 2007), mechanosensitive gating was  
307 triggered by applying a brief 2-4 s negative pressure ramp, then the same membrane potential  
308 of -70 mV was maintained without any additional suction for a total of 100 s as in (Deng et al.,  
309 2020). We then recorded the time from the initial pressure-triggered channel opening to final  
310 channel closure, defined as complete cessation of channel activity for 5 s (Figure 5). Most (89%)  
311 of MSL1-GFP channel openings lasted less than 20 s, and only 5.5% lasted for more than 80 s.  
312 100% of MSL1<sup>R326Q</sup>-GFP channel openings lasted less than 20 s. In contrast, a large proportion of  
313 MSL1<sup>D327G</sup>-GFP and MSL1<sup>D327N</sup>-GFP, channel openings lasted for more than 80 s (62.5% and 72.9%,  
314 respectively). Adding the R326Q mutation to these channels reduced the proportion of extremely  
315 long open dwell times to 48.4% and 42.1% for MSL1<sup>R326Q D327G</sup>-GFP and MSL1<sup>R326Q D327N</sup>-GFP,  
316 respectively (Figure 5). To summarize, we found that reducing the size and positive charge of the  
317 amino acid at position 326 decreased open dwell time, reducing the size and negative charge of  
318 position 327 amino acid increased open dwell time, and double mutants showed an intermediate  
319 open dwell time, suggesting that R326 and D327 in TM5 of MSL1 have opposite effects on closure  
320 efficiency.

321

322 **Some MSL1 variants have unstable open states.** Individual traces (Figure 6) at both -60 mV and  
323 -120 mV showed generally stable open states for MSL1-GFP, MSL1<sup>R326Q</sup>-GFP, and MSL1<sup>D327N</sup>-GFP.  
324 However, MSL1<sup>R326Q D327G</sup>-GFP, MSL1<sup>R326Q D327N</sup>-GFP, and MSL1<sup>D327G</sup>-GFP were flickery (Figure 6).  
325 Flickery channel behavior is produced by rapid transitions between nonconducting, conducting,  
326 and subconducting states, and is thought to be indicative of an unstable open state (Malcolm &  
327 Blount, 2015; Rasmussen et al., 2007). Thus, both the size and charge of residues at 326 and 327  
328 are important to the stability of the MSL1 open state.

329

330 **R326 and D327 mutations alter the physiological function of MSL1 in *E. coli*.** Like *EcMscS*, MSL1  
331 provides protection from hypo-osmotic shock to *E. coli* (Lee et al., 2016). To determine the effects  
332 of R326 and D327 mutations on this osmoregulatory function, we examined the ability of *E. coli*  
333 MJF465(DE3) cells expressing GFP-tagged MSL1 variants to survive hypoosmotic shock.  
334 MJF465(DE3) cells lack *MscS*, *MscL*, and *MscK* and therefore cannot survive severe hypoosmotic  
335 shock without expressing a functional MS ion channel (Levina, 1999). In this assay, cells are grown  
336 in high salt citrate-phosphate media, channel expression is induced, then cells are either  
337 hypoosmotically shocked in water or transferred to the same high salt media. FRAG-1(DE3) cells,  
338 which contain all endogenous MS channels, survive, while MJF465(DE3) cells do not. MSL1-GFP,  
339 MSL1<sup>R326Q</sup>-GFP, and MSL1<sup>R326Q D327G</sup>-GFP all conferred hypoosmotic shock survival rates  
340 comparable to that of FRAG-1 cells, suggesting they all contribute to osmoregulation during  
341 hypoosmotic shock (Figure 7A, B). Survival rates conferred by MSL1<sup>D327G</sup>-GFP expression were  
342 unusually variable and often higher for shocked cells than nonshocked cells (average survival rate  
343 of 160%, Figure 7A). Cells expressing MSL1<sup>D327N</sup>-GFP or MSL1<sup>R326Q D327N</sup>-GFP grew too slowly in  
344 citrate-phosphate media to be analyzed in this assay.

345  
346 MSL1-GFP variants thus had a variety of effects on *E. coli* physiology that may be attributed to a  
347 combination of gating pressure (Figure 4), open state dwell time (Figure 5), and open state  
348 stability (Figure 6). The reduced open dwell time of MSL1<sup>R326Q</sup>-GFP and extended open dwell time  
349 and increased gating pressure of MSL1<sup>R326Q D327G</sup>-GFP did not seem to affect their function in *E.*  
350 *coli* cells during hypoosmotic shock. In contrast, MSL1<sup>D327G</sup>-GFP provided large variations in  
351 protection between experiments, perhaps due to the combination of a lower gating threshold  
352 and extended open dwell times. It is unclear from our electrophysiological analysis why  
353 MSL1<sup>D327N</sup>-GFP and MSL1<sup>R326Q D327N</sup>-GFP impaired cell growth, as they had higher gating pressures  
354 than MSL1-GFP and therefore do not fit classic gain-of-function characteristics (Blount et al.,  
355 1997).

## 356 DISCUSSION

357 The *Arabidopsis* mitochondrial MS channel MSL1 contains a notable feature midway through its  
358 pore-lining TM5 helix: a kink formed by charged residues R326 and D327. In *EcMscS*, the pore-  
359 lining kink is proposed to play important roles in transitions between channel states (Akitake et  
360 al., 2007; Edwards et al., 2008; Lai et al., 2013; Pliotas et al., 2015; Vásquez et al., 2008; Wang et  
361 al., 2008), but the residues that comprise it are nonpolar. To determine the role played by R326  
362 and D327 in both distinct and shared characteristics of MSL1 and *EcMscS*, we created MSL1  
363 variants in which the charges and size of R326 and D327 were altered, then evaluated their  
364 channel behavior and physiological function in *E. coli*. Mutations to R326 and D327 affected  
365 tension sensitivity, open state dwell time, and open state stability, indicating a role in modulating  
366 MSL1 channel state stabilities and transitions, but did not affect stability, localization,  
367 conductance, nor rectification.

368  
369 Based on open and closed state cryoEM structures, we have proposed that MSL1 opening is  
370 driven by membrane flattening and area expansion (Deng et al., 2020). These forces drive the  
371 outward rotation and tilting of TM5 and the straightening of the kink that joins TM5a and TM5b  
372 during the MSL1 gating transition. The data presented here, summarized in Table 2, suggest that  
373 the charge and size of R326 and D327 side chains are important for the stability of the open state  
374 and for gating and closing transitions. Combining these results with cryoEM structures (Deng et  
375 al., 2020; Li et al., 2020), we infer that in the closed state, charge-charge repulsion between R326  
376 side chains on different monomers is finely balanced by charge-charge attractions between R326  
377 and D327 within each monomer (Figure 1B, D). In the open state, intra-monomeric attractive  
378 forces between R326 and D327 dominate and inter-monomeric repulsions lose strength, due to  
379 the increased distance between helices from different monomers and the shortened distance  
380 between R327 and D327 (Figure 1C, E). Below, we describe how our results can be explained by  
381 this “sweet spot” model.

382  
383 The most dramatic effect of the lesions we created was on open dwell time, where MSL1<sup>D327G</sup>-  
384 GFP, MSL1<sup>R326Q D327G</sup>-GFP, MSL1<sup>D327N</sup>-GFP, and MSL1<sup>R326Q D327N</sup>-GFP variants stayed open for much

385 longer times than MSL1-GFP (Figure 5). We interpret this to reflect the difficulty of the closing  
386 transition. All mutations to D327 had a longer open dwell time, suggesting that the charge-charge  
387 attraction between D327 and R326 facilitates closure. In contrast, MSL1<sup>R326Q</sup>-GFP exhibited  
388 decreased open dwell time (Figure 5). According to our sweet spot model, the R326Q mutation  
389 on its own also would suffer from a loss of charge-charge attraction, but this effect is  
390 overshadowed by the loss of repulsion between R326 on different monomers in the closed state.  
391 Combining mutations in both residues leads to a channel where both attractive and repulsive  
392 forces are lost, and the dwell time is intermediate between the two single mutants. A seemingly  
393 counterintuitive observation is that three channels (MSL1<sup>D327G</sup>-GFP, MSL1<sup>R326Q D327G</sup>-GFP, and  
394 MSL1<sup>R326Q D327N</sup>-GFP) have both long open dwell times and are flickery. Perhaps these channels  
395 have both an unstable open state (hence the flickering) and an increased barrier to closing. Once  
396 they are stably closed, however, they stay closed until additional tension is applied.

397  
398 Modest but statistically significant increases in gating pressure were observed with MSL1<sup>R326Q</sup>  
399 <sup>D327G</sup>-GFP, MSL1<sup>D327N</sup>-GFP, and MSL1<sup>R326Q D327N</sup>-GFP (Figure 4). These results cannot be easily  
400 explained by the sweet spot model described above, but are reminiscent of the attractive charge-  
401 charge interactions between the transmembrane and cytoplasmic domains of *EcMscS*  
402 (Machiyama et al., 2009; Nomura et al., 2008). We also observed a mild decrease in the gating  
403 pressure of MSL1<sup>D327G</sup>-GFP (Figure 4). This may arise from destabilization of the closed state due  
404 to the loss of attractive charge-charge interactions and dominance of repulsive forces. The  
405 addition of the R326Q mutation in the MSL1<sup>R326Q D327G</sup>-GFP may ameliorate this closed state  
406 repulsion, reversing the effects of the D327G mutation (Figure 4). However, due to the subtlety  
407 of all gating pressure changes we observed, other factors may also play a role that are beyond  
408 the scope of our model.

409  
410 The results presented here establish the importance of two rings of oppositely charged  
411 neighboring residues in the channel pore in modulating channel kinetics and open state stability  
412 for the mitochondrial MS ion channel MSL1. Our data support a sweet spot model wherein  
413 attraction between oppositely charged residues on the same monomer and repulsion from



414 identical residues on different monomers work together to facilitate opening and closing  
415 transitions as well as the stability of the closed and open states. Given their position at the pore-  
416 lining helix kink, a structural feature with demonstrated importance in *EcMscS* gating (Akitake et  
417 al., 2007; Edwards et al., 2008), this work provides a glimpse into how the same structural  
418 features can be composed of entirely distinct residues amongst members of the same MS  
419 channel family, creating different mechanisms of control. These results provide a starting point  
420 for future investigations into the fine-tuning of MSL1 gating transition, as well as insight into the  
421 dynamic network of side chain interactions contributing to MS channel behavior.

422

### 423 **ACKNOWLEDGMENTS**

424 We are grateful to Haswell Lab members past and present for valuable comments, support, and  
425 training. This work was supported by and HHMI-Simons Faculty Scholar Grant #55108530 to E.S.H.  
426 A.M.S. was supported by funding from the Spencer T. and Ann W. Olin Fellowship for  
427 Women in Graduate Study and the William H. Danforth Plant Sciences Fellowship

428 **REFERENCES**

- 429 Akitake, B., Anishkin, A., Liu, N., & Sukharev, S. (2007). Straightening and sequential buckling of  
430 the pore-lining helices define the gating cycle of MscS. *Nat Struct Mol Biol*, *14*(12),  
431 1141–1149. <https://doi.org/10.1038/nsmb1341>
- 432 Anishkin, A., Akitake, B., Kamaraju, K., Chiang, C.-S., & Sukharev, S. (2010). Hydration properties  
433 of mechanosensitive channel pores define the energetics of gating. *J Phys Condens*  
434 *Matter*, *22*(45), 454120. <https://doi.org/10.1088/0953-8984/22/45/454120>
- 435 Bartlett, J. L., Levin, G., & Blount, P. (2004). An in vivo assay identifies changes in residue  
436 accessibility on mechanosensitive channel gating. *PNAS*, *101*(27), 10161–10165.  
437 <https://doi.org/10.1073/pnas.0402040101>
- 438 Bass, R. B., Strop, P., Barclay, M., & Rees, D. C. (2002). Crystal Structure of Escherichia coli MscS,  
439 a Voltage-Modulated and Mechanosensitive Channel. *Science*, *298*(5598), 1582–1587.  
440 <https://doi.org/10.1126/science.1077945>
- 441 Basu, D., & Haswell, E. S. (2017). Plant mechanosensitive ion channels: An ocean of possibilities.  
442 *Current Opinion in Plant Biology*, *40*, 43–48. <https://doi.org/10.1016/j.pbi.2017.07.002>
- 443 Belyy, V., Anishkin, A., Kamaraju, K., Liu, N., & Sukharev, S. (2010). The tension-transmitting  
444 “clutch” in the mechanosensitive channel MscS. *Nat Struct Mol Biol*, *17*(4), 451–458.  
445 <https://doi.org/10.1038/nsmb.1775>
- 446 Bialecka-Fornal, M., Lee, H. J., & Phillips, R. (2015). The Rate of Osmotic Downshock Determines  
447 the Survival Probability of Bacterial Mechanosensitive Channel Mutants. *Journal of*  
448 *Bacteriology*, *197*(1), 231–237. <https://doi.org/10.1128/JB.02175-14>

- 449 Blount, P., Schroeder, M. J., & Kung, C. (1997). Mutations in a Bacterial Mechanosensitive  
450 Channel Change the Cellular Response to Osmotic Stress. *Journal of Biological*  
451 *Chemistry*, 272(51), 32150–32157. <https://doi.org/10.1074/jbc.272.51.32150>
- 452 Blount, P., Sukharev, S. I., Schroeder, M. J., Nagle, S. K., & Kung, C. (1996). Single residue  
453 substitutions that change the gating properties of a mechanosensitive channel in  
454 *Escherichia coli*. *PNAS*, 93(21), 11652–11657. <https://doi.org/10.1073/pnas.93.21.11652>
- 455 Boer, M., Anishkin, A., & Sukharev, S. (2011). Adaptive MscS gating in the osmotic permeability  
456 response in *E. coli*: The question of time. *Biochemistry*, 50(19), 4087–4096.  
457 <https://doi.org/10.1021/bi1019435>. Adaptive
- 458 Buda, R., Liu, Y., Yang, J., Hegde, S., Stevenson, K., Bai, F., & Pilizota, T. (2016). Dynamics of  
459 *Escherichia coli*'s passive response to a sudden decrease in external osmolarity.  
460 *Proceedings of the National Academy of Sciences*, 113(40), E5838–E5846.  
461 <https://doi.org/10.1073/pnas.1522185113>
- 462 Cox, C. D., Bavi, N., & Martinac, B. (2019). Biophysical principles of ion-channel-mediated  
463 mechanosensory transduction. *Cell Rep*, 29(1), 1–12.  
464 <https://doi.org/10.1016/j.celrep.2019.08.075>
- 465 Deng, Z., Maksaev, G., Schlegel, A. M., Zhang, J., Rau, M., Fitzpatrick, J. A. J., Haswell, E. S., &  
466 Yuan, P. (2020). Structural mechanism for gating of a eukaryotic mechanosensitive  
467 channel of small conductance. *Nat Commun*, 11(1), 3690.  
468 <https://doi.org/10.1038/s41467-020-17538-1>

- 469 Edwards, M. D., Bartlett, W., & Booth, I. R. (2008). Pore mutations of the Escherichia coli MscS  
470 channel affect desensitization but not ionic preference. *Biophys J*, *94*(8), 3003–3013.  
471 <https://doi.org/10.1529/biophysj.107.123448>
- 472 Edwards, M. D., Black, S., Rasmussen, T., Rasmussen, A., Stokes, N. R., Stephen, T.-L., Miller, S.,  
473 & Booth, I. R. (2012). Characterization of three novel mechanosensitive channel  
474 activities in Escherichia coli. *Channels*, *6*(4), 272–281.  
475 <https://doi.org/10.4161/chan.20998>
- 476 Epstein, W., & Kim, B. S. (1971). Potassium Transport Loci in Escherichia coli K-12. *J Bacteriol*,  
477 *108*(2), 639–644.
- 478 Fruleux, A., Verger, S., & Boudaoud, A. (2019). Feeling Stressed or Strained? A Biophysical  
479 Model for Cell Wall Mechanosensing in Plants. *Front Plant Sci*, *10*.  
480 <https://doi.org/10.3389/fpls.2019.00757>
- 481 Gerencser, A. A., Chinopoulos, C., Birket, M. J., Jastroch, M., Vitelli, C., Nicholls, D. G., & Brand,  
482 M. D. (2012). Quantitative measurement of mitochondrial membrane potential in  
483 cultured cells: Calcium-induced de- and hyperpolarization of neuronal mitochondria. *J*  
484 *Physiol (Lond.)*, *590*(12), 2845–2871. <https://doi.org/10.1113/jphysiol.2012.228387>
- 485 Hamilton, E. S., & Haswell, E. S. (2017). The Tension-sensitive Ion Transport Activity of MSL8 is  
486 Critical for its Function in Pollen Hydration and Germination. *Plant Cell Physiol*, *58*(7),  
487 1222–1237. <https://doi.org/10.1093/pcp/pcw230>
- 488 Hamilton, E. S., Jensen, G. S., Makshev, G., Katims, A., Sherp, A. M., & Haswell, E. S. (2015).  
489 Mechanosensitive channel MSL8 regulates osmotic forces during pollen hydration and  
490 germination. *Science*, *350*(6259), 438–441. <https://doi.org/10.1126/science.aac6014>

- 491 Hamilton, E. S., Schlegel, A. M., & Haswell, E. S. (2015). United in Diversity: Mechanosensitive  
492 Ion Channels in Plants. *Annu Rev Plant Biol*, *66*(1), 8.1-8.25.  
493 <https://doi.org/10.1146/annurev-arplant-043014-114700>
- 494 Haswell, E. S. (2007). MscS-Like Proteins in Plants. In *Current Topics in Membranes* (Vol. 58, pp.  
495 329–359). Elsevier. [https://doi.org/10.1016/S1063-5823\(06\)58013-5](https://doi.org/10.1016/S1063-5823(06)58013-5)
- 496 Haswell, E. S., & Meyerowitz, E. M. (2006). MscS-like Proteins Control Plastid Size and Shape in  
497 *Arabidopsis thaliana*. *Curr Biol*, *16*(1), 1–11. <https://doi.org/10.1016/j.cub.2005.11.044>
- 498 Haswell, E. S., Peyronnet, R., Barbier-Brygoo, H., Meyerowitz, E. M., & Frachisse, J. M. (2008).  
499 Two MscS Homologs Provide Mechanosensitive Channel Activities in the *Arabidopsis*  
500 Root. *Curr Biol*, *18*(10), 730–734. <https://doi.org/10.1016/j.cub.2008.04.039>
- 501 Kloda, A, & Martinac, B. (2001). Structural and functional differences between two homologous  
502 mechanosensitive channels of *Methanococcus jannaschii*. *The EMBO Journal*, *20*(8),  
503 1888–1896. <https://doi.org/10.1093/emboj/20.8.1888>
- 504 Kloda, Anna, & Martinac, B. (2001). Molecular Identification of a Mechanosensitive Channel in  
505 Archaea. *Biophys J*, *80*(1), 229–240. [https://doi.org/10.1016/S0006-3495\(01\)76009-2](https://doi.org/10.1016/S0006-3495(01)76009-2)
- 506 Kung, C., Martinac, B., & Sukharev, S. (2010). Mechanosensitive channels in microbes. *Annual*  
507 *Review of Microbiology*, *64*, 313–329.  
508 <https://doi.org/10.1146/annurev.micro.112408.134106>
- 509 Lai, J. Y., Poon, Y. S., Kaiser, J. T., & Rees, D. C. (2013). Open and shut: Crystal structures of the  
510 dodecylmaltoside solubilized mechanosensitive channel of small conductance from  
511 *Escherichia coli* and *Helicobacter pylori* at 4.4 Å and 4.1 Å resolutions. *Protein Sci*, *22*(4),  
512 502–509. <https://doi.org/10.1002/pro.2222>

- 513 Lee, C. P., Maksaev, G., Jensen, G. S., Murcha, M. W., Wilson, M. E., Fricker, M., Hell, R.,  
514 Haswell, E. S., Millar, A. H., & Sweetlove, L. J. (2016). MSL1 is a mechanosensitive ion  
515 channel that dissipates mitochondrial membrane potential and maintains redox  
516 homeostasis in mitochondria during abiotic stress. *Plant J*, *88*(5), 809–825.  
517 <https://doi.org/10.1111/tpj.13301>
- 518 Levina, N. (1999). Protection of Escherichia coli cells against extreme turgor by activation of  
519 MscS and MscL mechanosensitive channels: Identification of genes required for MscS  
520 activity. *EMBO J*, *18*(7), 1730–1737. <https://doi.org/10.1093/emboj/18.7.1730>
- 521 Li, L., Liu, K., Hu, Y., Li, D., & Luan, S. (2008). Single mutations convert an outward K<sup>+</sup> channel  
522 into an inward K<sup>+</sup> channel. *Proceedings of the National Academy of Sciences*, *105*(8),  
523 2871–2876. <https://doi.org/10.1073/pnas.0712349105>
- 524 Li, Y., Hu, Y., Wang, J., Liu, X., Zhang, W., & Sun, L. (2020). Structural Insights into a Plant  
525 Mechanosensitive Ion Channel MSL1. *Cell Rep*, *30*(13), 4518-4527.e3.  
526 <https://doi.org/10.1016/j.celrep.2020.03.026>
- 527 Machiyama, H., Tatsumi, H., & Sokabe, M. (2009). Structural Changes in the Cytoplasmic  
528 Domain of the Mechanosensitive Channel MscS During Opening. *Biophys J*, *97*(4), 1048–  
529 1057. <https://doi.org/10.1016/j.bpj.2009.05.021>
- 530 Maksaev, G. & Haswell, E. (2012). MscS-Like10 is a stretch-activated ion channel from  
531 Arabidopsis thaliana with a preference for anions. *PNAS*, *109*(46), 19015–19020.  
532 <https://doi.org/10.1073/pnas.1213931109>
- 533 Maksaev, Grigory, Shoots, J. M., Ohri, S., & Haswell, E. S. (2018). Nonpolar residues in the  
534 presumptive pore-lining helix of mechanosensitive channel MSL10 influence channel

- 535 behavior and establish a nonconducting function. *Plant Direct*, 2(6), e00059.
- 536 <https://doi.org/10.1002/pld3.59>
- 537 Malcolm, H. R., & Blount, P. (2015). Mutations in a Conserved Domain of E. coli MscS to the
- 538 Most Conserved Superfamily Residue Leads to Kinetic Changes. *PLoS ONE*, 10(9),
- 539 e0136756. <https://doi.org/10.1371/journal.pone.0136756>
- 540 Malcolm, H. R., & Maurer, J. A. (2012). The Mechanosensitive Channel of Small Conductance
- 541 (MscS) Superfamily: Not Just Mechanosensitive Channels Anymore. *ChemBioChem*,
- 542 13(14), 2037–2043. <https://doi.org/10.1002/cbic.201200410>
- 543 Nakayama, Y., Fujii, K., Sokabe, M., & Yoshimura, K. (2007). Molecular and electrophysiological
- 544 characterization of a mechanosensitive channel expressed in the chloroplasts of
- 545 Chlamydomonas. *PNAS*, 104(14), 5883–5888. <https://doi.org/10.1073/pnas.0609996104>
- 546 Nakayama, Yoshitaka, Yoshimura, K., & Iida, H. (2013). Electrophysiological Characterization of
- 547 the Mechanosensitive Channel MscCG in Corynebacterium glutamicum. *Biophys J*,
- 548 105(6), 1366–1375. <https://doi.org/10.1016/j.bpj.2013.06.054>
- 549 Nomura, T., Sokabe, M., & Yoshimura, K. (2008). Interaction between the Cytoplasmic and
- 550 Transmembrane Domains of the Mechanosensitive Channel MscS. *Biophys J*, 94(5),
- 551 1638–1645. <https://doi.org/10.1529/biophysj.107.114785>
- 552 Okada, K., Moe, P. C., & Blount, P. (2002). Functional Design of Bacterial Mechanosensitive
- 553 Channels COMPARISONS AND CONTRASTS ILLUMINATED BY RANDOM MUTAGENESIS. *J*
- 554 *Biol Chem*, 277(31), 27682–27688. <https://doi.org/10.1074/jbc.M202497200>

- 555 Persat, A., Nadell, C. D., Kim, M. K., Ingremeau, F., Siryaporn, A., Drescher, K., Wingreen, N. S.,  
556 Bassler, B. L., Gitai, Z., & Stone, H. A. (2015). The Mechanical World of Bacteria. *Cell*,  
557 *161*(5), 988–997. <https://doi.org/10.1016/j.cell.2015.05.005>
- 558 Petrov, E., Palanivelu, D., Constantine, M., Rohde, P. R., Cox, C. D., Nomura, T., Minor, D. L., &  
559 Martinac, B. (2013). Patch-Clamp Characterization of the MscS-like Mechanosensitive  
560 Channel from *Silicibacter pomeroyi*. *Biophys J*, *104*(7), 1426–1434.  
561 <https://doi.org/10.1016/j.bpj.2013.01.055>
- 562 Pivetti, C. D., Yen, M.-R., Miller, S., Busch, W., Tseng, Y.-H., Booth, I. R., & Saier, M. H. (2003).  
563 Two Families of Mechanosensitive Channel Proteins. *MMBR*, *67*(1), 66–85.  
564 <https://doi.org/10.1128/MMBR.67.1.66-85.2003>
- 565 Pliotas, C., Dahl, A. C. E., Rasmussen, T., Mahendran, K. R., Smith, T. K., Marius, P., Gault, J.,  
566 Banda, T., Rasmussen, A., Miller, S., Robinson, C. V., Bayley, H., Sansom, M. S. P., Booth,  
567 I. R., & Naismith, J. H. (2015). The role of lipids in mechanosensation. *Nat Struct Mol*  
568 *Biol*, *22*(12), 991–998. <https://doi.org/10.1038/nsmb.3120>
- 569 Ranade, S. S., Syeda, R., & Patapoutian, A. (2015). Mechanically Activated Ion Channels. *Neuron*,  
570 *87*(6), 1162–1179. <https://doi.org/10.1016/j.neuron.2015.08.032>
- 571 Rasmussen, A., Rasmussen, T., Edwards, M. D., Schauer, D., Schumann, U., Miller, S., & Booth, I.  
572 R. (2007). The Role of Tryptophan Residues in the Function and Stability of the  
573 Mechanosensitive Channel MscS from *Escherichia coli*. *Biochemistry*, *46*(38), 10899–  
574 10908. <https://doi.org/10.1021/bi701056k>



- 575 Rasmussen, T., Flegler, V. J., Rasmussen, A., & Böttcher, B. (2019). Structure of the  
576 Mechanosensitive Channel MscS Embedded in the Membrane Bilayer. *J Mol Biol*,  
577 431(17), 3081–3090. <https://doi.org/10.1016/j.jmb.2019.07.006>
- 578 Reddy, B., Bavi, N., Lu, A., Park, Y., & Perozo, E. (2019). Molecular basis of force-from-lipids  
579 gating in the mechanosensitive channel MscS. *eLife*, 8, e50486.  
580 <https://doi.org/10.7554/eLife.50486>
- 581 Rojas, E., Theriot, J. A., & Huang, K. C. (2014). Response of Escherichia coli growth rate to  
582 osmotic shock. *PNAS*, 111(21), 7807–7812. <https://doi.org/10.1073/pnas.1402591111>
- 583 Romantsov, T., Battle, A. R., Hendel, J. L., Martinac, B., & Wood, J. M. (2010). Protein  
584 localization in Escherichia coli cells: Comparison of the cytoplasmic membrane proteins  
585 ProP, LacY, ProW, AqpZ, MscS, and MscL. *J Bacteriol*, 192(4), 912–924.  
586 <https://doi.org/10.1128/JB.00967-09>
- 587 Rowe, I., Elahi, M., Huq, A., & Sukharev, S. (2013). The mechanoelectrical response of the  
588 cytoplasmic membrane of Vibrio cholerae. *J Gen Physiol*, 142(1), 75–85.  
589 <https://doi.org/10.1085/jgp.201310985>
- 590 Schlegel, A. M., & Haswell, E. S. (2020). Analyzing plant mechanosensitive ion channels  
591 expressed in giant E. coli spheroplasts by single-channel patch-clamp electrophysiology.  
592 In *Methods in Cell Biology* (p. S0091679X20300133). Elsevier.  
593 <https://doi.org/10.1016/bs.mcb.2020.02.007>
- 594 Schwarzländer, M., Logan, D. C., Johnston, I. G., Jones, N. S., Meyer, A. J., Fricker, M. D., &  
595 Sweetlove, L. J. (2012). Pulsing of Membrane Potential in Individual Mitochondria: A

- 596           Stress-Induced Mechanism to Regulate Respiratory Bioenergetics in *Arabidopsis*. *Plant*  
597           *Cell*, 24(3), 1188–1201. <https://doi.org/10.1105/tpc.112.096438>
- 598 Steinbacher, S., Bass, R., Strop, P., & Rees, D. C. (2007). Structures of the Prokaryotic  
599           Mechanosensitive Channels MscL and MscS. In *Current Topics in Membranes* (Vol. 58,  
600           pp. 1–24). Elsevier. [https://doi.org/10.1016/S1063-5823\(06\)58001-9](https://doi.org/10.1016/S1063-5823(06)58001-9)
- 601 Sukharev, S. (2002). Purification of the small mechanosensitive channel of *Escherichia coli*  
602           (MscS): The subunit structure, conduction, and gating characteristics in liposomes.  
603           *Biophys J*, 83(1), 290–298. [https://doi.org/10.1016/S0006-3495\(02\)75169-2](https://doi.org/10.1016/S0006-3495(02)75169-2)
- 604 Sukharev, S., Akitake, B., & Anishkin, A. (2007). The Bacterial Mechanosensitive Channel MscS:  
605           Emerging Principles of Gating and Modulation. In *Current Topics in Membranes* (Vol. 58,  
606           pp. 235–267). Academic Press. [https://doi.org/10.1016/S1063-5823\(06\)58009-3](https://doi.org/10.1016/S1063-5823(06)58009-3)
- 607 van den Berg, J., Galbiati, H., Rasmussen, A., Miller, S., & Poolman, B. (2016). On the mobility,  
608           membrane location and functionality of mechanosensitive channels in *Escherichia coli*.  
609           *Sci Rep*, 6(1), 1–11. <https://doi.org/10.1038/srep32709>
- 610 Vásquez, V., Sotomayor, M., Cordero-Morales, J., Schulten, K., & Perozo, E. (2008). A Structural  
611           Mechanism for MscS Gating in Lipid Bilayers. *Science*, 321(5893), 1210–1214.  
612           <https://doi.org/10.1126/science.1159674>
- 613 Veley, K. M., Maksaev, G., Frick, E. M., January, E., Kloepper, S. C., & Haswell, E. S. (2014).  
614           Arabidopsis MSL10 Has a Regulated Cell Death Signaling Activity That Is Separable from  
615           Its Mechanosensitive Ion Channel Activity. *The Plant Cell*, 26(7), 3115–3131.  
616           <https://doi.org/10.1105/tpc.114.128082>

- 617 Veley, K. M., Marshburn, S., Clure, C. E., & Haswell, E. S. (2013). Mechanosensitive Channels  
618 Protect Plastids from Hypoosmotic Stress During Normal Plant Growth. *Curr Biol*, 22(5),  
619 408–413. <https://doi.org/10.1016/j.cub.2012.01.027>.Mechanosensitive
- 620 Wang, W., Black, S. S., Edwards, M. D., Miller, S., Morrison, E. L., Bartlett, W., Dong, C.,  
621 Naismith, J. H., & Booth, I. R. (2008). The Structure of an Open Form of an E. coli  
622 Mechanosensitive Channel at 3.45 Å Resolution. *Science*, 321(5893), 1179–1183.  
623 <https://doi.org/10.1126/science.1159262>
- 624 Yang, C., Zhang, X., Guo, Y., Meng, F., Sachs, F., & Guo, J. (2015). Mechanical dynamics in live  
625 cells and fluorescence-based force/tension sensors. *Biochim Biophys Acta*, 1853(8),  
626 1889–1904. <https://doi.org/10.1016/j.bbamcr.2015.05.001>
- 627

| MSL1 Variant                | Conductance (nS)         |                           |                          |
|-----------------------------|--------------------------|---------------------------|--------------------------|
|                             | -120 mV                  | -60 mV                    | 60 mV                    |
| MSL1-GFP                    | 1.19 ± 0.12 <sup>a</sup> | 1.19 ± 0.10 <sup>a</sup>  | 0.34 ± 0.02 <sup>a</sup> |
| MSL1 <sup>R326Q</sup> -GFP  | 1.29 ± 0.11 <sup>a</sup> | 1.13 ± 0.12 <sup>a</sup>  | 0.46 ± 0.11 <sup>a</sup> |
| MSL1 <sup>D327G</sup>       | 1.22 ± 0.15 <sup>a</sup> | 1.14 ± 0.17 <sup>a</sup>  | 0.42 ± 0.06 <sup>a</sup> |
| MSL1 <sup>R326Q D327G</sup> | 1.10 ± 0.20 <sup>a</sup> | 0.82 ± 0.08 <sup>bc</sup> | 0.29 ± 0.04 <sup>a</sup> |
| MSL1 <sup>D327N</sup>       | 1.07 ± 0.24 <sup>a</sup> | 1.04 ± 0.12 <sup>ab</sup> | 0.41 ± 0.07 <sup>a</sup> |
| MSL1 <sup>R326Q D327N</sup> | 1.22 ± 0.24 <sup>a</sup> | 0.81 ± 0.11 <sup>c</sup>  | 0.33 ± 0.07 <sup>a</sup> |

**Table 1. Mutations to R326 and D327 in MSL1 have little effect on channel conductance.** Conductance values represent the mean of average patch conductances for 3-7 patches per variant. Differences were statistically evaluated using one-way ANOVA with post-hoc Scheffe's test; letters indicate statistical differences ( $p < 0.05$ ).

| MSL1 Variant                | Conductance   | Gating Pressure       | Open State Stability | Open State Dwell Time |
|-----------------------------|---------------|-----------------------|----------------------|-----------------------|
| WT MSL1                     | -             | -                     | Stable               | -                     |
| MSL1 <sup>R326Q</sup>       | WT            | 1.12 WT <sup>ns</sup> | Stable               | Short                 |
| MSL1 <sup>D327G</sup>       | WT            | 0.75 WT <sup>ns</sup> | Flickery             | Very Long             |
| MSL1 <sup>R326Q D327G</sup> | Low at -60 mV | 1.32 WT               | Slight Flicker       | Long                  |
| MSL1 <sup>D327N</sup>       | WT            | 1.39 WT               | Stable               | Very Long             |
| MSL1 <sup>R326Q D327N</sup> | Low at -60 mV | 1.45 WT               | Slight Flicker       | Long                  |

**Table 2. Summary of GFP-tagged MSL1 variant properties.** Conductance and gating pressure are presented relative to MSL1-GFP measurements. <sup>ns</sup> indicates differences from WT are not statistically significant.

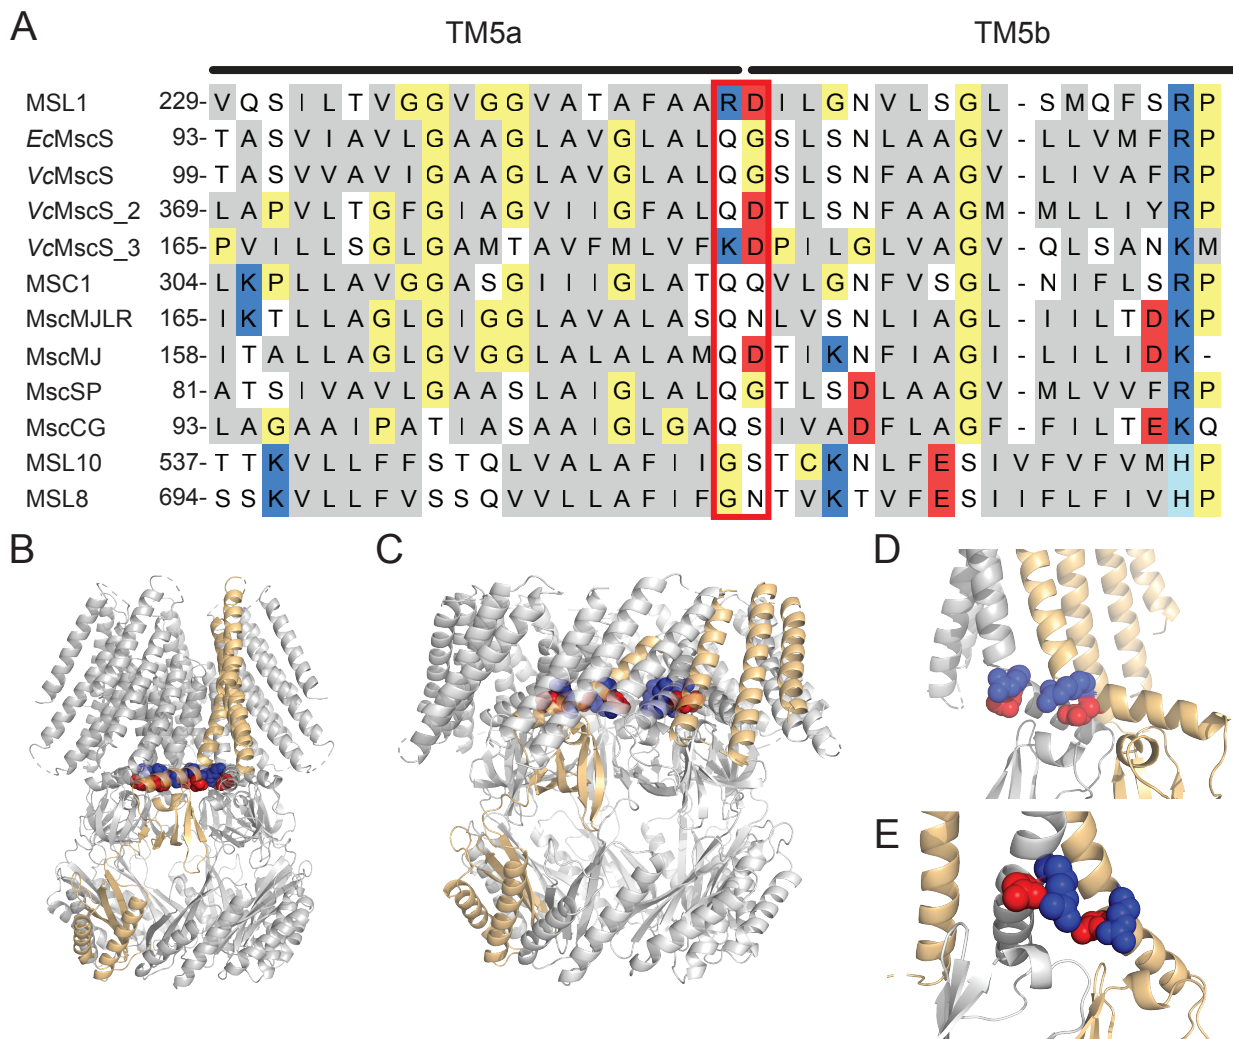

**Figure 1. R326 and D327 are charged residues in the kinked pore-lining TM5 helix of the MS ion channel MSL1.** (A) Alignment of pore-lining helices from MscS family members for which rectification information is available. Non-polar residues are gray, polar residues white, positively charged residues blue, negatively charged residues red, and other residues pale yellow. R326 and D327 of MSL1 and the corresponding residues in other MscS family members are highlighted by a red box. (B-E) Images of cryoEM structures of MSL1 (PDB file 6VXM (Deng et al., 2020)) and MSL1<sup>A320V</sup> (PDF file 6VXN (Deng et al., 2020)) in closed and open states, respectively. One monomer is light orange and residues R326 (blue) and D327 (red) are indicated. (B, C) Side view of the placement of R326 and D327 in the TM5 kink of MSL1 (B) and MSL1<sup>A320V</sup> (C) multimers, respectively. (D, E) Close-up view of the R326 and D327 residues in two adjacent monomers, one grey and one light orange, as viewed from inside the MSL1 (D) and MSL1<sup>A320V</sup> (E) pores.

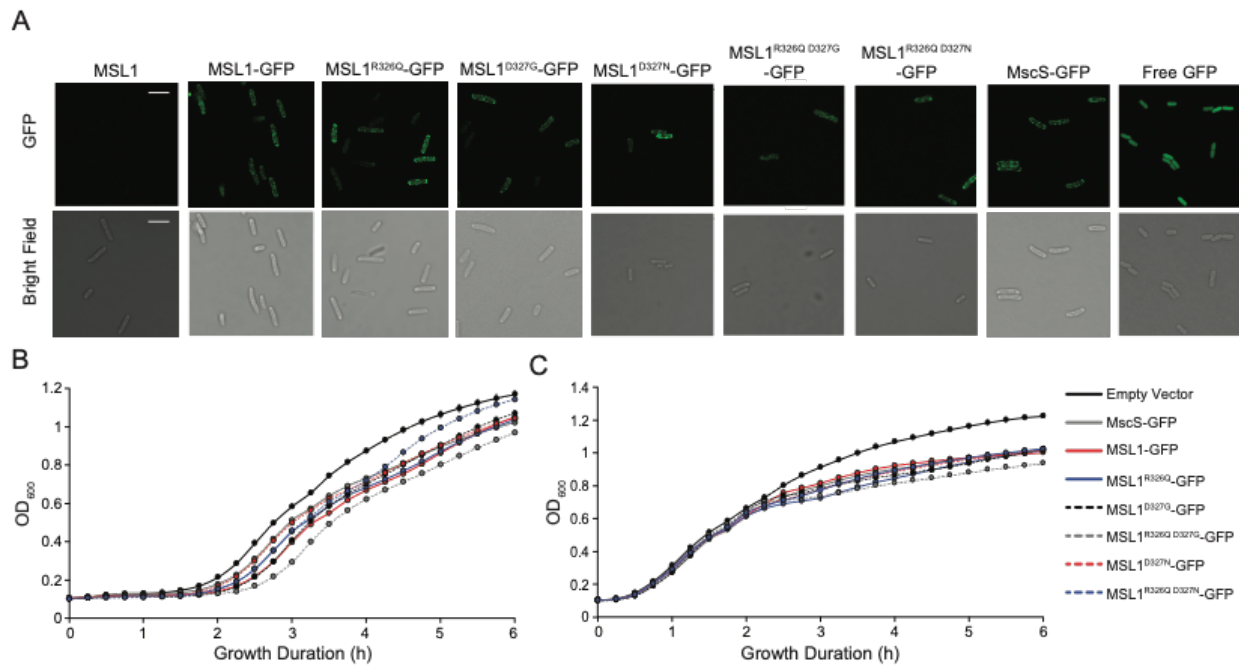

**Figure 2. MSL1 variants localize to *E. coli* cell membranes and do not impact *E. coli* cell growth in LB.** (A) Confocal micrographs of MJF465(DE3) cells expressing untagged MSL1, MSL1-GFP, a GFP-tagged MSL1 variant, MscS-GFP, or cytoplasmic GFP. Scale bars are 5  $\mu$ m. (B-C) Growth curves of MJF465(DE3) cells transformed with pET300 vectors encoding the indicated protein or an empty pET21b(+) control. Cells were grown in LB with (B) or without (C) IPTG and OD<sub>600</sub> values measured every 15 min. Data points are shown  $\pm$  standard deviation, although error bars may be too small to be visible.

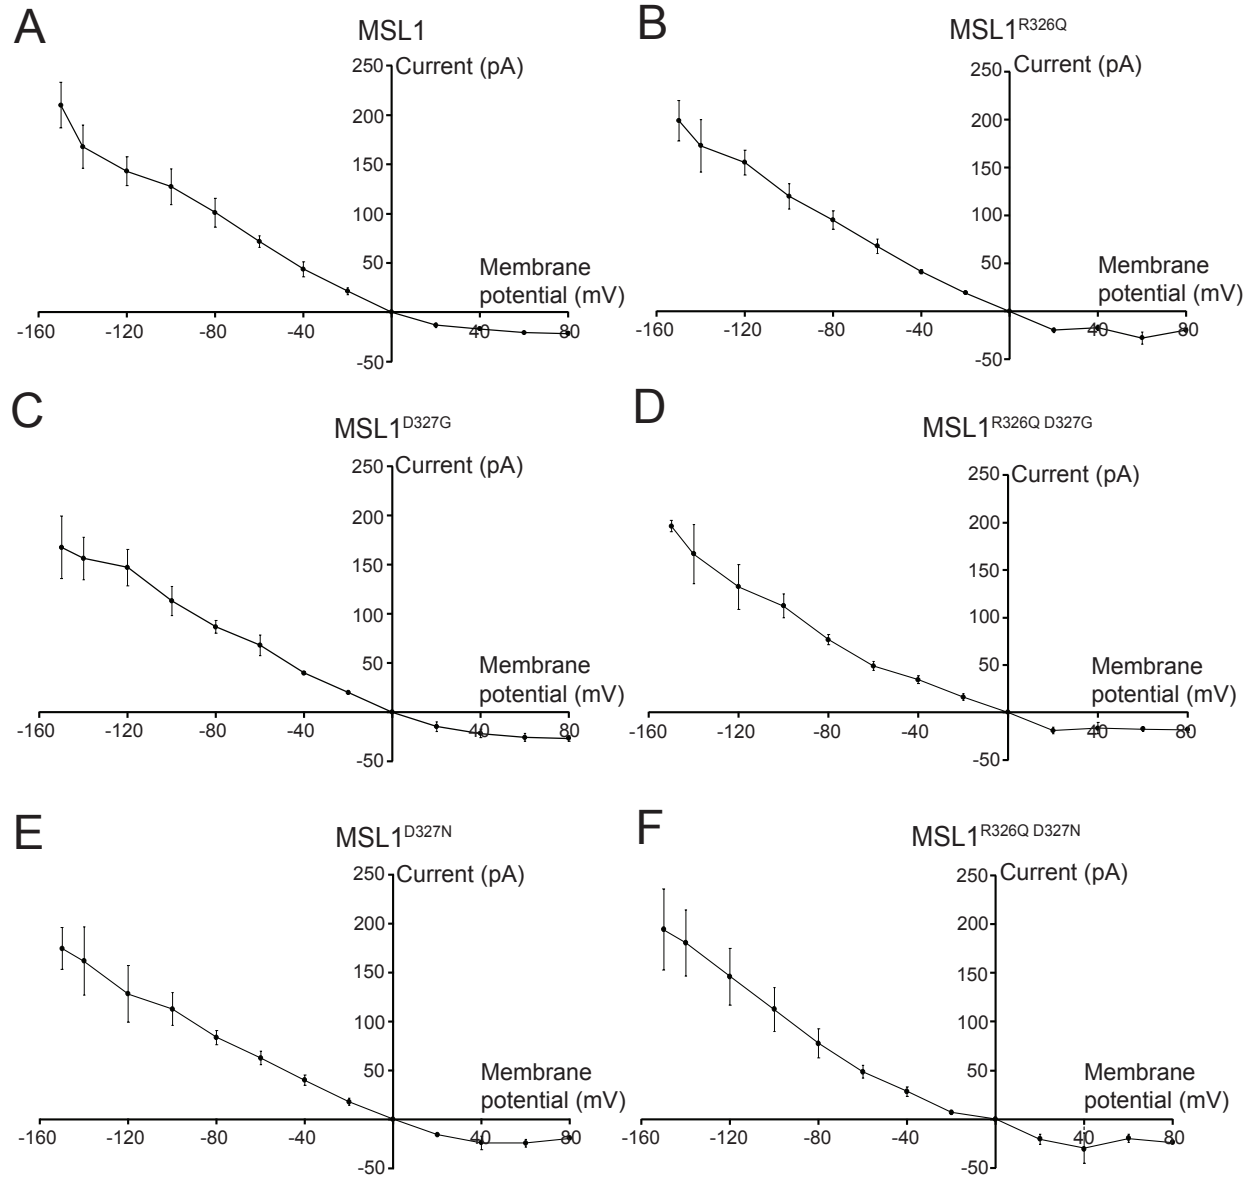

**Figure 3. Mutations to R326 and D327 of MSL1 do not affect rectification.** IV curves for GFP-tagged MSL1 variants expressed in MJF641(DE3) cells. Each data point represents the average single-channel current for 3 to 17 patches. Error bars indicate standard deviation.

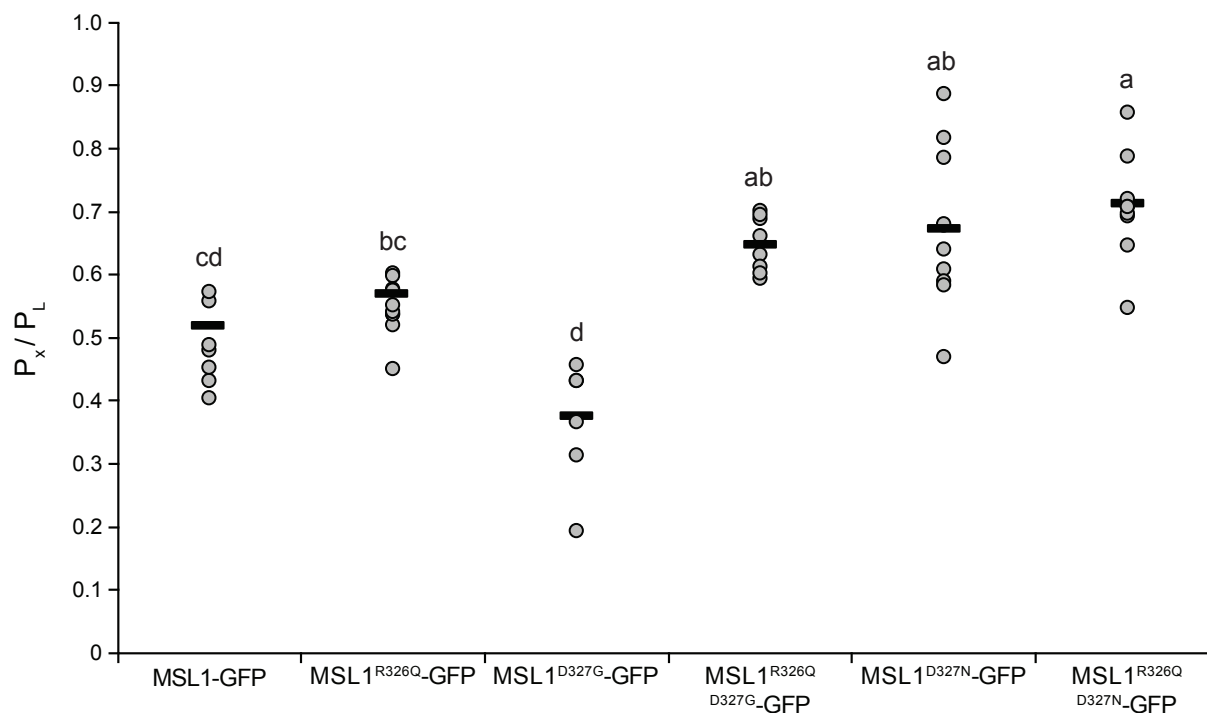

**Figure 4.** MSL1<sup>R326Q D327G</sup>-GFP, MSL1<sup>D327N</sup>-GFP, and MSL1<sup>R326Q D327N</sup>-GFP have significantly higher gating pressures than MSL1-GFP. Gating pressures of the indicated GFP-tagged MSL1 variants relative to the gating pressures of endogenously expressed MscL. Channels were gated using 5-10 s symmetric pressure ramps at a membrane potential of -70 mV. Each gray circle represents the average of all gating pressure ratios obtained for a single patch, while the black bars represent the mean of patch averages for each sample. N = 6-10 patches per variant. Statistical differences were examined using one-way ANOVA with post-hoc Scheffe's test; significant differences are indicated by different letters ( $p < 0.05$ ). Data points greater than two standard deviations beyond the sample average were excluded.



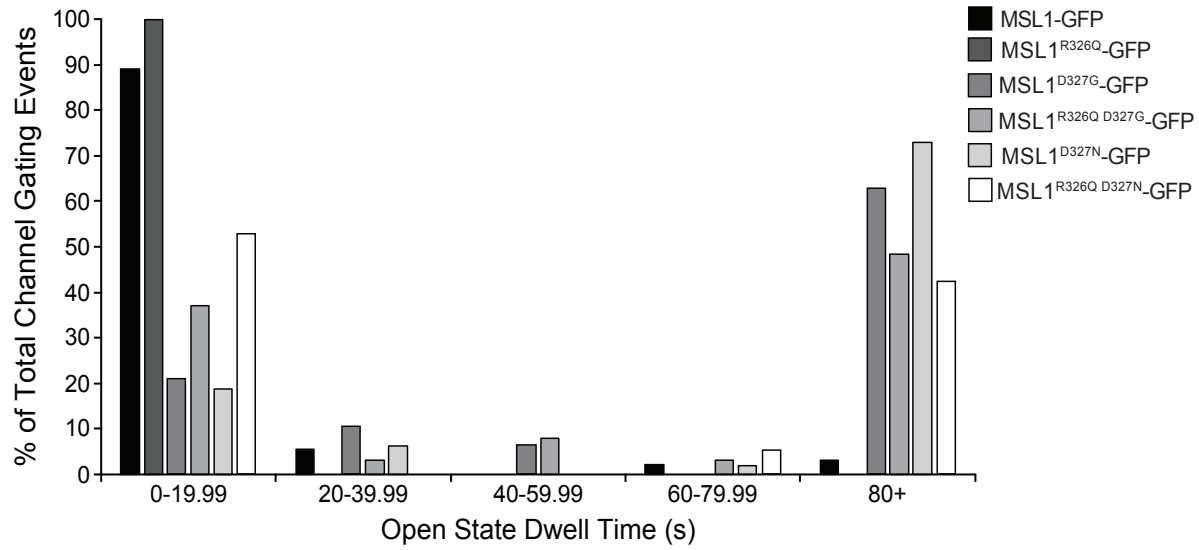

**Figure 5. Effect of R326 and D327 mutations on the open state dwell time of MSL1-GFP variants.** Membrane potential was maintained at -70 mV and channel gating was triggered by either a 2 s or 4 s symmetric pressure ramp followed by monitoring of channel activity without additional pressure until 97.7 s. Results from 19-97 traces from 9-10 patches per variant are shown.

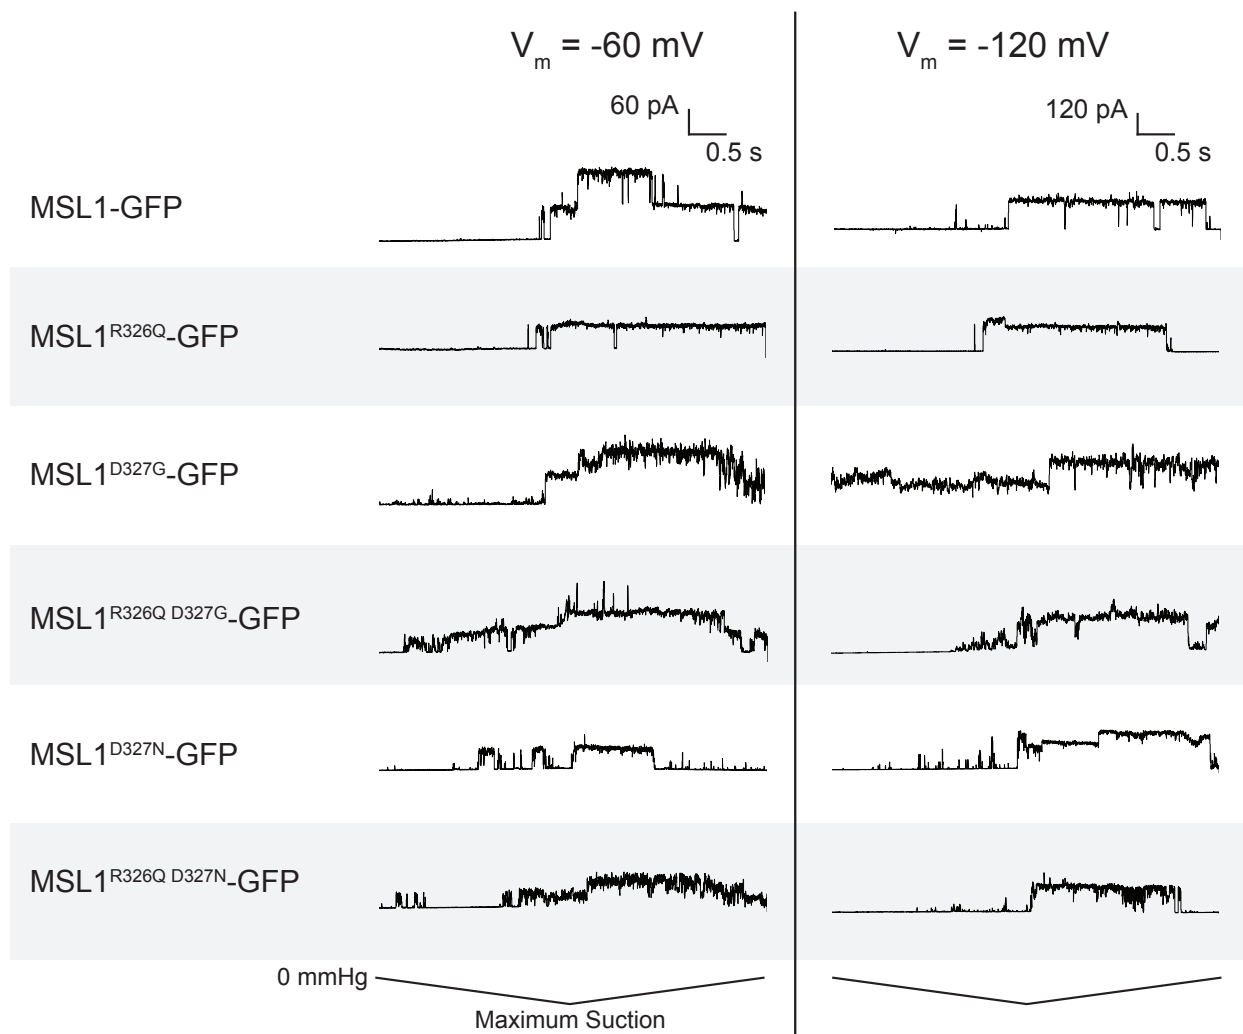

**Figure 6. R326 and D327 influence open state stability of MSL1.** Representative traces from inside-out excised patches showing pressure-activated gating events of MJF641(DE3) cells expressing the indicated constructs at two membrane potentials. Traces show current measurements taken during a 5 s symmetric negative pressure ramp, with the maximum amount of negative pressure (and therefore rate of pressure application) varying between traces.

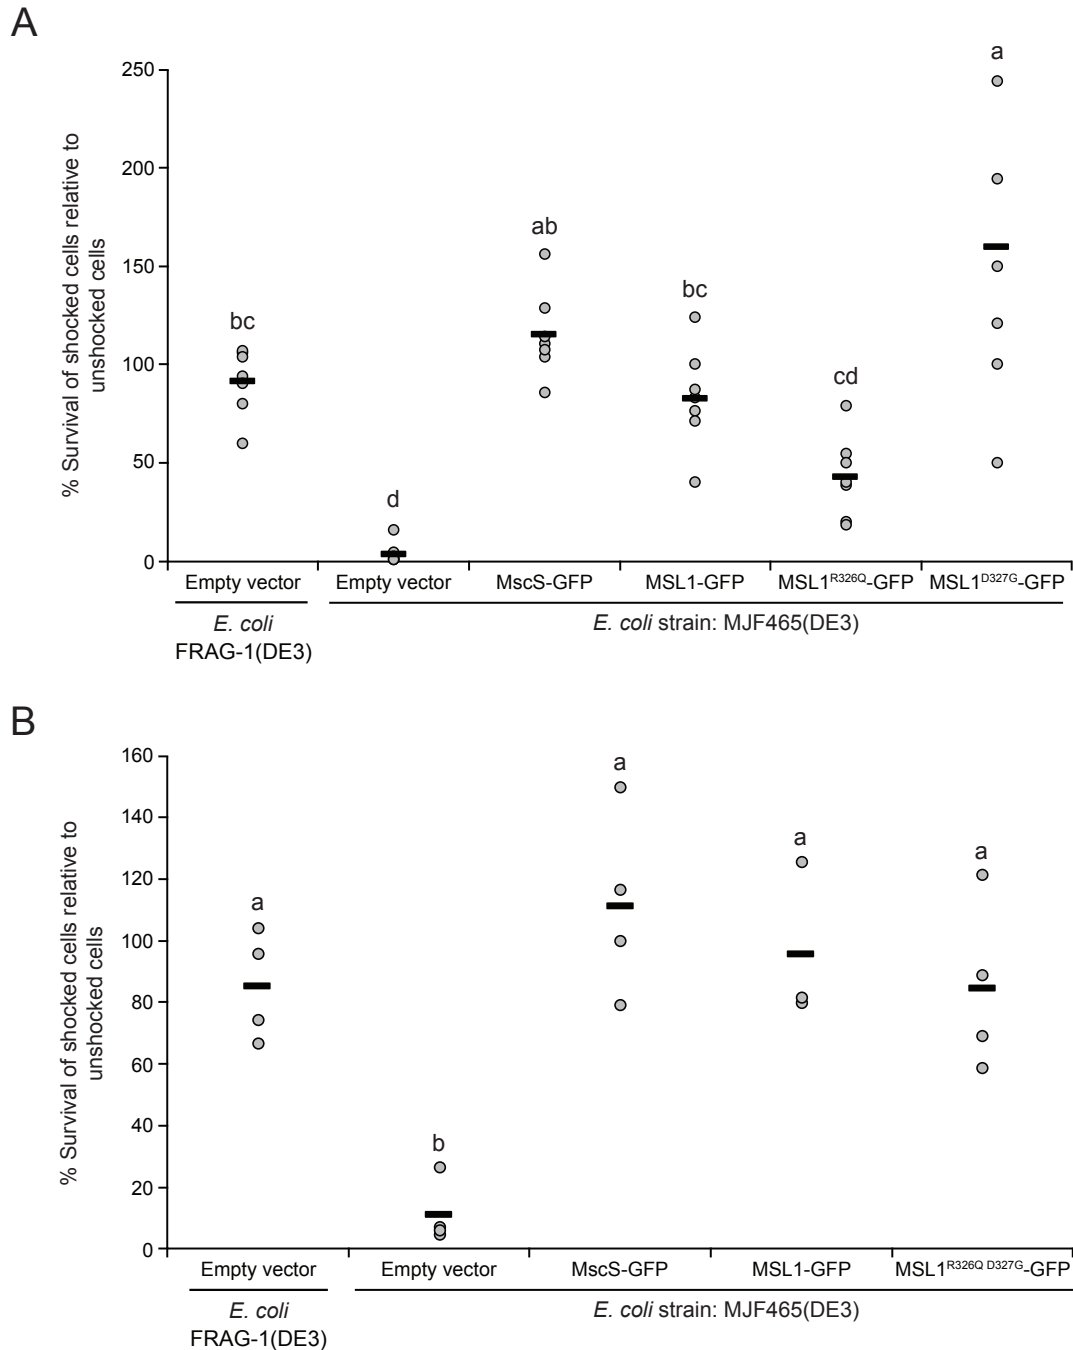

**Figure 7. Some MSL1 variants protect *E. coli* strain MJF465(DE3) from hypoosmotic shock.** Hypoosmotic shock survival rates of cells from the indicated strains relative to unshocked controls. Each circle represents the relative survival rate for an experiment and black bars indicate the average survival rate for all experiments. For each panel, statistical differences were evaluated using one-way ANOVA followed by a post-hoc Scheffe's test; different letters indicate significant differences ( $p < 0.05$ ). One data point greater than two standard deviations beyond the sample average was excluded.
